# Supplementary material
Source: Springer Nature journal article supplement (https://www.springermedizin.de/resource/supplementary/13058_2010_2740_MOESM8_ESM.pdf/9702050)

**A**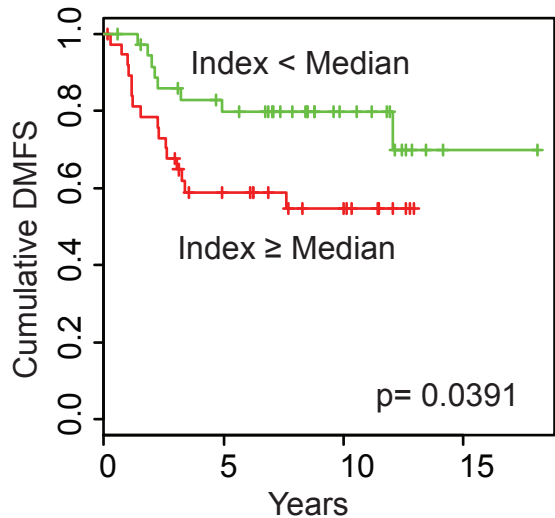**B**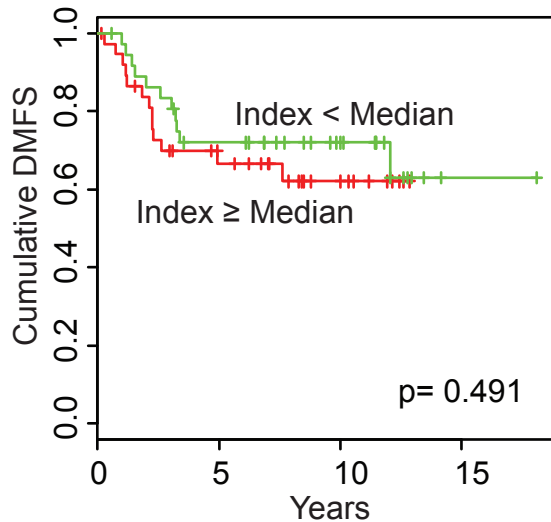**C**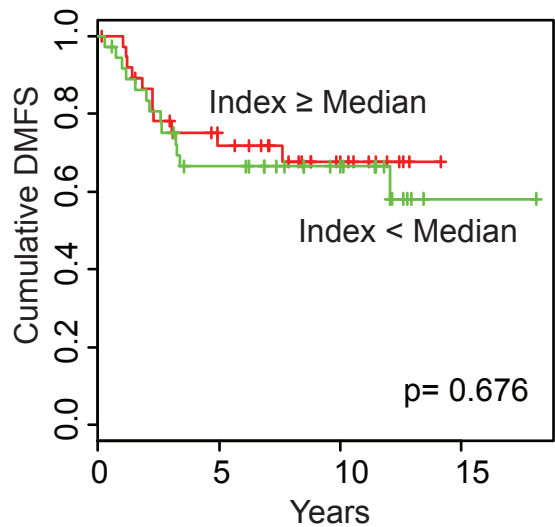**D**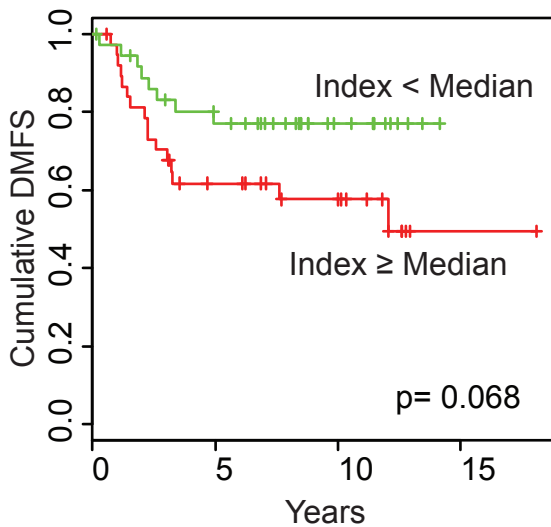

Supplement: MOESM8 [file 9702050]
